# Supplementary material
Source: HighWire-hosted journal article supplement (doi:10.1101/rna.070490.119)
Supplement: Supplemental_Equation_S1.pdf [file Supplemental_Equation_S1.pdf]

**Supplemental Equation S1.**

$$\text{Frameshift efficiency (FSE)} = \left( \frac{\left( \frac{\text{firefly luminescence}}{\text{Renilla luminescence}} \right)_{\text{Exp.}}}{\left( \frac{\text{firefly luminescence}}{\text{Renilla luminescence}} \right)_{\text{Cont.}}} \right) \times 100\%$$
