# Supplementary material
Source: HighWire-hosted journal article supplement (doi:10.1101/rna.070490.119)
Supplement: Supplemental_Equation_S2.pdf [file Supplemental_Equation_S2.pdf]

**Supplemental Equation S2.**

$$s_e (\text{FSE}) = (\text{FSE}) \times \sqrt{\left[ \frac{\frac{\text{Sample variance}}{\text{Number of replicates}}}{\left( \frac{\text{firefly luminescence}}{\text{Renilla luminescence}} \right)^2} \right]_{\text{Exp.}} + \left[ \frac{\frac{\text{Sample variance}}{\text{Number of replicates}}}{\left( \frac{\text{firefly luminescence}}{\text{Renilla luminescence}} \right)^2} \right]_{\text{Cont.}}}$$
