# Supplementary material
Source: HighWire-hosted journal article supplement (doi:10.1101/rna.070490.119)
Supplement: Supplemental_Figure_S1.pdf [file Supplemental_Figure_S1.pdf]

A) Brierley et al. 1989

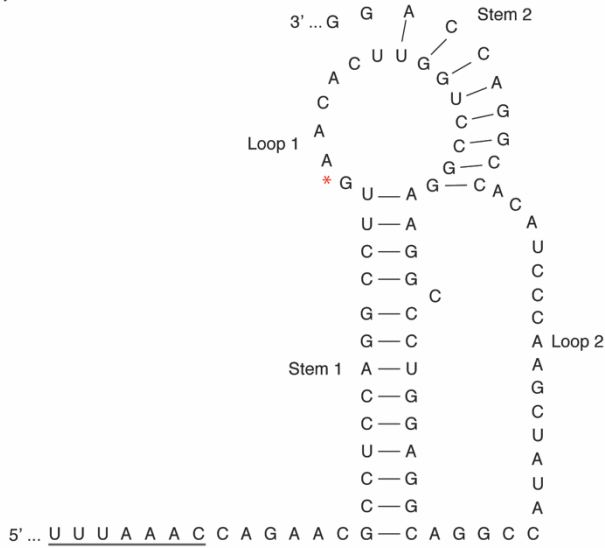

B) ten Dam et al. 1990

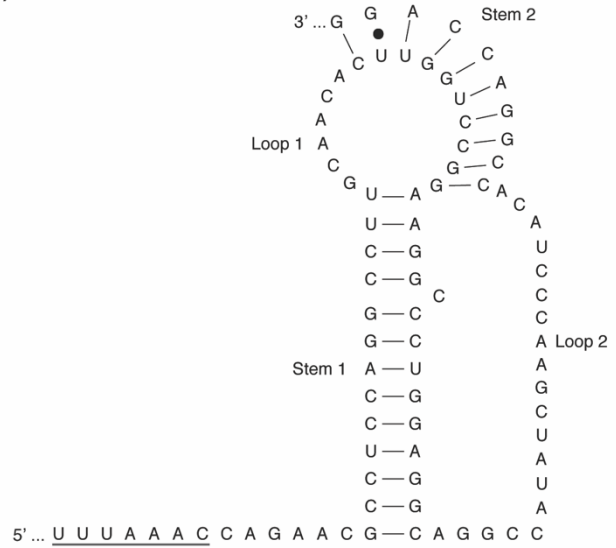

C) Le et al. 1991

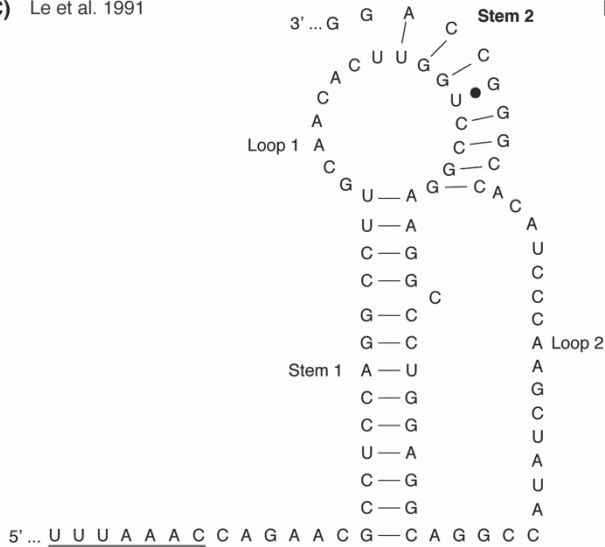

D)

| Reference            | Pseudoknot stem and loop lengths |        |        |        |
|----------------------|----------------------------------|--------|--------|--------|
|                      | Stem 1                           | Loop 1 | Stem 2 | Loop 2 |
| Brierley et al. 1989 | 13                               | 7      | 8      | 20     |
| ten Dam et al. 1990  | 13                               | 6      | 10     | 20     |
| Le et al. 1991       | 13                               | 8      | 8      | 20     |

**Supplemental Figure S1. The HTLV-1 *pro-pol* frameshift site structure was previously proposed to be an H-type pseudoknot.** The structures in A) and B) were proposed using a different HTLV-1 sequence than the sequence used in this manuscript (NC\_001436.1). A) Brierley et al. used an HTLV-1 sequence that was taken from references cited in Jacks et al. (Jacks et al. 1988; Brierley et al. 1989). To the best of our knowledge, the HTLV-1 sequence referenced in the Jacks et al. is X04800.1 (Hiramatsu et al. 1987). However, there is a discrepancy between the sequence shown in Figure 7 of Brierley et al. (Brierley et al. 1989) and the X04800.1 sequence. The X04800.1 sequence includes a “C” that is missing from the Brierley et al. publication. The

location of this “C” is indicated by a red asterisk in the model here. B) ten Dam et al. used the same sequence as Brierly et al. (GenBank X04800.1), but proposed that pseudoknot stem 2 was extended by two additional base-pairs (ten Dam et al. 1990). C) Le et al. used an HTLV-1 sequence from *Human Retroviruses and AIDS* (Myers et al. 1989; Le et al. 1991). The HTLV-1 frameshift site sequence shown in their publication is consistent with the frameshift site sequence used here (NC\_001436.1). D) In these models, the lengths of stem 1 (13 base-pairs) and loop 2 (20 nucleotides) were consistent, but the lengths of loop 1 (6-8 nucleotides) and stem 2 (8 or 10 base-pairs) varied.

### **Supplemental References**

- Brierley I, Digard P, Inglis SC. 1989. Characterization of an efficient coronavirus ribosomal frameshifting signal: requirement for an RNA pseudoknot. *Cell* **57**: 537-547.
- Hiramatsu K, Nishida J, Naito A, Yoshikura H. 1987. Molecular Cloning of the Closed Circular Provirus of Human T Cell Leukaemia Virus Type I: A New Open Reading Frame in the gag-pol Region. *J Gen Virol* **68**: 213-218.
- Jacks T, Madhani HD, Masiarz FR, Varmus HE. 1988. Signals for ribosomal frameshifting in the Rous sarcoma virus gag-pol region. *Cell* **55**: 447-458.
- Le SY, Shapiro BA, Chen JH, Nussinov R, Maizel JV. 1991. RNA pseudoknots downstream of the frameshift sites of retroviruses. *Genet Anal Tech Appl* **8**: 191-205.
- Myers G, Rabson AB, Josephs SF, Smith TF, Wong-Stall F. 1989. *Human Retroviruses and AIDS*, Los Alamos, NM.
- ten Dam EB, Pleij CW, Bosch L. 1990. RNA pseudoknots: translational frameshifting and readthrough on viral RNAs. *Virus Genes* **4**: 121-136.
