# Supplementary material
Source: HighWire-hosted journal article supplement (doi:10.1101/rna.070490.119)
Supplement: Supplemental_Figure_S7.pdf [file Supplemental_Figure_S7.pdf]

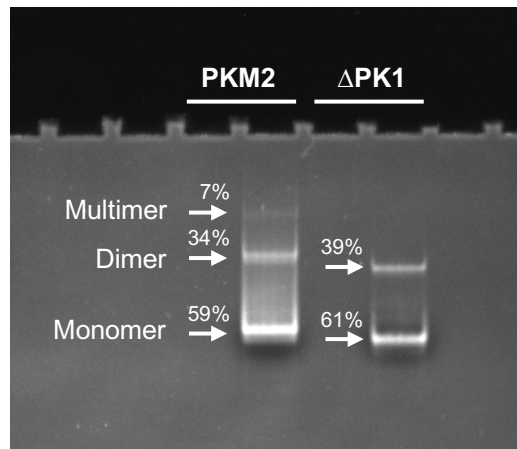

**Supplemental Figure S7. Non-denaturing PAGE analysis of  $\Delta$ PK1 and PKM2 refolding.** The  $\Delta$ PK1 and PKM2 RNAs (0.08  $\mu$ M, 800  $\mu$ L) were incubated for 5 minutes at 90°C in a MgCl<sub>2</sub>-free buffer (50 mM Na-HEPES, pH 8.0) and then cooled on ice for 10 minutes. Magnesium chloride (0.8  $\mu$ L, 1 M MgCl<sub>2</sub>) was added and the samples (0.08  $\mu$ M RNA, 50 mM Na-HEPES, pH 8.0, 1 mM MgCl<sub>2</sub>) were incubated for 20 minutes at room temperature. The refolded RNAs were spin-concentrated using Amicon-Ultra (0.5 mL, 10 kDa MWCO) Centrifugal Filters to ~2.4  $\mu$ M prior to their analysis with 6% non-denaturing PAGE (1 mM MgCl<sub>2</sub>). Percent monomer, dimer, and multimer were estimated using ImageJ2 (Rueden et al. 2017). The error in these measurements is estimated at ~5%.

**Supplemental Reference:**

Rueden CT, Schindelin J, Hiner MC, DeZonia BE, Walter AE, Arena ET, Eliceiri KW. 2017.

ImageJ2: ImageJ for the next generation of scientific image data. *BMC Bioinformatics* 18: 529.
