# Supplementary material
Source: HighWire-hosted journal article supplement (doi:10.1101/rna.070490.119)
Supplement: Supplemental_Table_S1.pdf [file Supplemental_Table_S1.pdf]

**Supplemental Table S1.** Non-template strand sequences inserted into the p2luc and puc19 vectors are shown.

| Vector | Construct                       | Non-template strand insert sequence (5' – 3'). Restriction sites are underlined.                                                |
|--------|---------------------------------|---------------------------------------------------------------------------------------------------------------------------------|
| p2luc  | WT <sup>†</sup><br>experimental | <u>GGATCCTTTAAACCAGAACGCCTCCAGGCCTTGCAACACTTG</u><br>GTCCGGAAGGCCCTGGAGGCAGGCCATATCGAACCTACAC<br>CGGGCCAGGAAATAAC <u>GAGCTC</u> |
| p2luc  | WT control                      | <u>GGATCCTTTCAACCAGAACGCCTCCAGGCCTTGCAACACTTG</u><br>GTCCGGAAGGCCCTGGAGGCAGGCCATATCGAACCTACAC<br>CGGGCCAGGAAATAAC <u>GAGCTC</u> |
| p2luc  | ΔPK1<br>experimental            | <u>GGATCCTTTAAACCAGAACGCCTCCAGGCCTTGCAACACTTG</u><br>GTCCGGAAGGCCCTGGAGGCAGGCCATATCGAACCTACAC<br><u>CGAGCTC</u>                 |
| p2luc  | ΔPK1 control                    | <u>GGATCCTTTCAACCAGAACGCCTCCAGGCCTTGCAACACTTG</u><br>GTCCGGAAGGCCCTGGAGGCAGGCCATATCGAACCTACAC<br><u>CAGAGCTC</u>                |
| p2luc  | ΔPK2<br>experimental            | <u>GGATCCTTTAAACCAGAACGCCTCCAGGCCTTGCAACACTTG</u><br>GTCCGGAAGGCCCTGGAGGCAGGCCATATCGAACCTAC <u>GA</u><br><u>GCTC</u>            |
| p2luc  | ΔPK2 control                    | <u>GGATCCTTTCAACCAGAACGCCTCCAGGCCTTGCAACACTTG</u><br>GTCCGGAAGGCCCTGGAGGCAGGCCATATCGAACCTAC <u>AG</u><br><u>AGCTC</u>           |
| p2luc  | ΔPK3<br>experimental            | <u>GGATCCTTTAAACCAGAACATAACGAGCTC</u>                                                                                           |
| p2luc  | ΔPK3 control                    | <u>GGATCCTTTCAACCAGAACATAACAGAGCTC</u>                                                                                          |
| p2luc  | PKM1<br>experimental            | <u>GGATCCTTTAAACCAGAACGCCTCCAGGCCTTGCAACACTTG</u><br>GTCCGGAAGGCCCTGGAGGCAGGCCATATCGAACCTACAG<br>GCCTGGTCCAAATAAC <u>GAGCTC</u> |
| p2luc  | PKM1<br>control                 | <u>GGATCCTTTCAACCAGAACGCCTCCAGGCCTTGCAACACTTG</u><br>GTCCGGAAGGCCCTGGAGGCAGGCCATATCGAACCTACAG<br>GCCTGGTCCAAATAAC <u>GAGCTC</u> |
| p2luc  | PKM2<br>experimental            | <u>GGATCCTTTAAACCAGAACGCCTCCAGGCCTTGCAACAGGAC</u><br>CGGGCCAAGGCCCTGGAGGCAGGCCATATCGAACCTACAC<br>CGGGCCAGGAAATAAC <u>GAGCTC</u> |
| p2luc  | PKM2<br>control                 | <u>GGATCCTTTCAACCAGAACGCCTCCAGGCCTTGCAACAGGAC</u><br>CGGGCCAAGGCCCTGGAGGCAGGCCATATCGAACCTACAC<br>CGGGCCAGGAAATAAC <u>GAGCTC</u> |
| p2luc  | PKM3<br>experimental            | <u>GGATCCTTTAAACCAGAACGCCTCCAGGCCTTGCAACAGGAC</u><br>CGGGCCAAGGCCCTGGAGGCAGGCCATATCGAACCTACAG<br>GCCTGGTCCAAATAAC <u>GAGCTC</u> |

| Vector                                                                                                                                                   | Construct    | Non-template strand insert sequence (5' – 3'). Restriction sites are underlined.                                                                                                                                                                                                                     |
|----------------------------------------------------------------------------------------------------------------------------------------------------------|--------------|------------------------------------------------------------------------------------------------------------------------------------------------------------------------------------------------------------------------------------------------------------------------------------------------------|
| p2luc                                                                                                                                                    | PKM3 control | <u>GGATCC</u> CTTCAACCAGAACGCCTCCAGGCCTTGCAACAGGAC<br>CGGGCCAAGGCCCTGGAGGCAGGCCATATCGAACCTACAG<br>GCCTGGTCCAAATAACAGAGCTC                                                                                                                                                                            |
| Out-of-frame background control                                                                                                                          | Experimental | <u>GGATCC</u> CTTCAACCAGAACATAACGAGCTC                                                                                                                                                                                                                                                               |
| puc19                                                                                                                                                    | WT           | <u>GAATTC</u> TTCTAATACGACTCACTATAGGGAATCAGCCAGTTCC<br>CTTTAAACCAGAACGCCTCCAGGCCTTGCAACACTTGGTCCG<br>GAAGGCCCTGGAGGCAGGCCATATCGAACCTACACCGGGC<br>CAGGAAATAACCCAGTATTCCCAGTTAAAAAAGCCAATGGAAC<br>CTGGCAGAGACCGGATCC                                                                                   |
| puc19                                                                                                                                                    | PKM3         | <u>GAATTC</u> TTCTAATACGACTCACTATAGGGTGGGCTAGAACACC<br>TCCCAAGGCCCCCGAAATCAGCCAGTTCCCTTTAAACCAGA<br>ACGCCTCCAGGCCTTGCAACAGGACCGGGCCAAGGCCCTGG<br>AGGCAGGCCATATCGAACCTACAGGCCTGGTCCAAATAACC<br>CAGTATTCCCAGTTAAAAAAGCCAATGGAACCTGGCGATTCAT<br>CCACGACCTGCGGGCCACTAACTCTCTAACCATAGATCAGAG<br>ACCGGATCC |
| †The WT HTLV-1 sequence was derived from NCBI Reference Sequence NC_001436.1, which is the complete genome sequence of the Human T-lymphotropic virus 1. |              |                                                                                                                                                                                                                                                                                                      |
