# Supplementary material
Source: HighWire-hosted journal article supplement (doi:10.1101/rna.070490.119)
Supplement: Supplemental_Table_S2.pdf [file Supplemental_Table_S2.pdf]

**Supplemental Table S2.** Primers used in PCR assembly of dsDNA templates.

| dsDNA template | Primer      | Sequence (5' – 3')                                               |
|----------------|-------------|------------------------------------------------------------------|
| WT             | Forward (F) | TTCTAATACGACTCACTATAGGAAACGACTCGAGTAGAGTCGT<br>CCCTTTAAACCAGAACG |
|                | Reverse (R) | GTTGTTGTTGTTGTTTCTTTTGTGGAGTCTACTCGACTCCGTT<br>ATTCCTGGCCCGGTG   |
| $\Delta$ PK1   | 1F          | TTCTAATACGACTCACTATAGGAAACGACTCGAGTAGAGTCGT<br>CCCTTTAAACCAGAACG |
|                | 2R          | CAGGGCCTTCCGGACCAAGTGTGCAAGGCCTGGAGGCGTT<br>CTGGTTTAAAGGGACGACT  |
|                | 3F          | TTGGTCCGGAAGGCCCTGGAGGCAGGCCATATCGAACCCCTA<br>CACCGGA            |
|                | 4R          | GTTGTTGTTGTTGTTTCTTTTGTGGAGTCTACTCGACTCCGG<br>TGTAGGGTTCGATATGG  |
| PKM1           | 1F          | TTCTAATACGACTCACTATAGGAAACGACTCGAGTAGAGTCGT<br>CCCTTTAAACCAGAACG |
|                | 2R          | CCAGGGCCTTCCGGACCAAGTGTGCAAGGCCTGGAGGCGT<br>TCTGGTTTAAAGGGACGAC  |
|                | 3F          | GTCCGGAAGGCCCTGGAGGCAGGCCATATCGAACCCCTACAG<br>GCCTGGTCCAATAACGG  |
|                | 4R          | GTTGTTGTTGTTGTTTCTTTTGTGGAGTCTACTCGACTCCGTT<br>ATTTGGACCAGGCCTG  |
| PKM2           | 1F          | TTCTAATACGACTCACTATAGGAAACGACTCGAGTAGAGTCGT<br>CCCTTTAAACCAGAACG |
|                | 2R          | CAGGGCCTTGGCCCGTCTGTTGCAAGGCCTGGAGGCGTT<br>CTGGTTTAAAGGGACGACT   |
|                | 3F          | CGGGCCAAGGCCCTGGAGGCAGGCCATATCGAACCCCTACAC<br>CGGGCCAGGAAATAACG  |
|                | 4R          | GTTGTTGTTGTTGTTTCTTTTGTGGAGTCTACTCGACTCCGTT<br>ATTCCTGGCCCGGTG   |
| PKM3           | F           | TTCTAATACGACTCACTATAGGAAACGACTCGAGTAGAGTCGT<br>CCCTTTAAACCAGAACG |
|                | R           | GTTGTTGTTGTTGTTTCTTTTGTGGAGTCTACTCGACTCCGTT<br>ATTTGGACCAGGCCTG  |
