# Supplementary material
Source: HighWire-hosted journal article supplement (doi:10.1101/rna.070490.119)
Supplement: Supplemental_Table_S3.pdf [file Supplemental_Table_S3.pdf]

**Supplemental Table S3.** dsDNA templates sequences used during *in vitro* transcription.

| <b>dsDNA template</b> | <b>Non-template strand sequence (5' – 3')</b>                                                                                                                                                       |
|-----------------------|-----------------------------------------------------------------------------------------------------------------------------------------------------------------------------------------------------|
| WT                    | TTCTAATACGACTCACTATAGGAAACGACTCGAGTAGAGTCGTCC<br>CTTTAAACCAGAACGCCTCCAGGCCTTGCAACACTTGGTCCGGAA<br>GGCCCTGGAGGCAGGCCATATCGAACCCCTACACCGGGCCAGGA<br>AATAACGGAGTCGAGTAGACTCCAACAAAAGAAACAACAACA<br>AC  |
| ΔPK1                  | TTCTAATACGACTCACTATAGGAAACGACTCGAGTAGAGTCGTCC<br>CTTTAAACCAGAACGCCTCCAGGCCTTGCAACACTTGGTCCGGAA<br>GGCCCTGGAGGCAGGCCATATCGAACCCCTACACCGGAGTCGAGT<br>AGACTCCAACAAAAGAAACAACAACAAC                     |
| PKM1                  | TTCTAATACGACTCACTATAGGAAACGACTCGAGTAGAGTCGTCC<br>CTTTAAACCAGAACGCCTCCAGGCCTTGCAACACTTGGTCCGGAA<br>GGCCCTGGAGGCAGGCCATATCGAACCCCTACAGGCCTGGTCCAA<br>ATAACGGAGTCGAGTAGACTCCAACAAAAGAAACAACAACA<br>C   |
| PKM2                  | TTCTAATACGACTCACTATAGGAAACGACTCGAGTAGAGTCGTCC<br>CTTTAAACCAGAACGCCTCCAGGCCTTGCAACAGGACCGGGCCA<br>AGGCCCTGGAGGCAGGCCATATCGAACCCCTACACCGGGCCAGG<br>AAATAACGGAGTCGAGTAGACTCCAACAAAAGAAACAACAACA<br>AAC |
| PKM3                  | TTCTAATACGACTCACTATAGGAAACGACTCGAGTAGAGTCGTCC<br>CTTTAAACCAGAACGCCTCCAGGCCTTGCAACAGGACCGGGCCA<br>AGGCCCTGGAGGCAGGCCATATCGAACCCCTACAGGCCTGGTCCA<br>AATAACGGAGTCGAGTAGACTCCAACAAAAGAAACAACAACA<br>AC  |
