# Supplementary material
Source: HighWire-hosted journal article supplement (doi:10.1101/rna.070490.119)
Supplement: Supplemental_Table_S4.pdf [file Supplemental_Table_S4.pdf]

**Supplemental Table S4.** RNA sequences used in the chemical probing experiments.

Differences in sequence from the WT RNA are underlined.

| <b>construct</b> | <b>Sequence (5' – 3')</b>                                                                                                                                                         |
|------------------|-----------------------------------------------------------------------------------------------------------------------------------------------------------------------------------|
| WT               | GGAAACGACUCGAGUAGAGUCGUCCCUUUAACCAGAACGCCU<br>CCAGGCCUUGCAACACUUGGUCCGGAAGGCCCUUGGAGGCAGG<br>CCAUAUCGAACCCUACACCGGGCCAGGAAUAACGGAGUCGAG<br>UAGACUCCAACAAAAGAAACAACAACAAC          |
| $\Delta$ PK1     | GGAAACGACUCGAGUAGAGUCGUCCCUUUAACCAGAACGCCU<br>CCAGGCCUUGCAACACUUGGUCCGGAAGGCCCUUGGAGGCAGG<br>CCAUAUCGAACCCUACACC_____GGAGUCGAG<br>UAGACUCCAACAAAAGAAACAACAACAAC                   |
| PKM1             | GGAAACGACUCGAGUAGAGUCGUCCCUUUAACCAGAACGCCU<br>CCAGGCCUUGCAACACUUGGUCCGGAAGGCCCUUGGAGGCAGG<br>CCAUAUCGAACCCUACAGGCCUGGUCCAAUAACGGAGUCGAG<br>UAGACUCCAACAAAAGAAACAACAACAAC          |
| PKM2             | GGAAACGACUCGAGUAGAGUCGUCCCUUUAACCAGAACGCCU<br>CCAGGCCUUGCAACAGGACCGGGCCAAGGCCCUUGGAGGCAGG<br>CCAUAUCGAACCCUACACCGGGCCAGGAAUAACGGAGUCGAG<br>UAGACUCCAACAAAAGAAACAACAACAAC          |
| PKM3             | GGAAACGACUCGAGUAGAGUCGUCCCUUUAACCAGAACGCCU<br>CCAGGCCUUGCAACAGGACCGGGCC <u>A</u> AGGCCCUUGGAGGCAGG<br>CCAUAUCGAACCCUACAGGCCUGGUCCAAUAACGGAGUCGAG<br>UAGACUCCAACAAAAGAAACAACAACAAC |
