# Supplementary material
Source: HighWire-hosted journal article supplement (doi:10.1101/rna.070490.119)
Supplement: Supplemental_Table_S5.xlsx [file Supplemental_Table_S5.xlsx]

## Sheet: Sheet1
Supplemental Table S5. Summary of in vitro dual luciferase reporter assay statistics.
RNA reporter	WT E	WT C	∆PK1 E	∆PK1 C	∆PK2 E	∆PK2 C	PKM1 E	PKM1 C	PKM2 E	PKM2 C	PKM3 E	PKM3 C	HIV-1 E	HIV-1 C	∆PK3 E	∆PK3 C	Out-of-frame background control
Maximum ratio	0.0292496	0.144242	0.00518717	0.151309	0.00756561	0.146686	0.00388913	0.151849	0.0172519	0.175739	0.0423077	0.148878	0.0104916	0.155587	0.00159383	0.168544	0.00215294
75th percentile	0.0284213	0.143481	0.00455209	0.147081	0.0072277	0.145327	0.00384015	0.14976	0.0166367	0.174523	0.0417365	0.147475	0.0104505	0.152727	0.00141781	0.165062	0.00213532
Median	0.0274801	0.143034	0.00429758	0.144267	0.00712217	0.144619	0.00373074	0.148363	0.0162269	0.170748	0.0412137	0.144585	0.0103617	0.150667	0.00139961	0.163797	0.00208072
25th percentile	0.0268977	0.141311	0.00405898	0.142542	0.00703124	0.144014	0.00362718	0.145154	0.0159363	0.168861	0.0407801	0.14171	0.0102545	0.149076	0.00136963	0.163636	0.00204386
Minimum ratio	0.0263316	0.138201	0.0039082	0.139676	0.00664337	0.141564	0.00361109	0.140282	0.0149013	0.164555	0.0396531	0.138592	0.0100871	0.148441	0.00132183	0.152584	0.00194818
Fourth spread (fs)	0.00152361	0.00217032	0.000493106	0.00453855	0.000196455	0.00131285	0.00021297	0.0046059	0.000700458	0.00566173	0.000956349	0.00576498	0.000196025	0.00365118	4.81805e-05	0.00142557	9.14596e-05
Upper outlier boundary	0.0297655	0.14629	0.00503723	0.151074	0.00741685	0.146588	0.0040502	0.155272	0.0172776	0.179241	0.0426482	0.153232	0.0106558	0.156144	0.00147188	0.166649	0.00221791
Lower outlier boundary	0.0251947	0.139779	0.00355792	0.137459	0.00682748	0.142649	0.00341128	0.141454	0.0151762	0.162256	0.0397792	0.135937	0.0100677	0.14519	0.00132734	0.160946	0.00194353
Number of outliers	0	1	1	1	2	2	0	1	1	0	1	0	0	0	2	2†	0
Mean	0.027646	0.142806	0.004285	0.143865	0.007128	0.14466	0.003738	0.148353	0.016287	0.171125	0.041426	0.144418	0.010331	0.150973	0.001396	0.164132	0.002079
Variance	1.01e-06	1.35e-06	8.11e-08	8.4e-06	2.48e-08	1.06e-06	1.42e-08	6.48e-06	2.61e-07	1.51e-05	3.92e-07	1.37e-05	1.97e-08	6.03e-06	7.68e-10	2.11e-06	4.9e-09
Standard deviation	0.001004	0.001161	0.000285	0.002899	0.000157	0.001031	0.000119	0.002545	0.000511	0.003882	0.000626	0.0037	0.00014	0.002455	2.77e-05	0.001453	7e-05
Standard error	0.000355	0.00041	7.61e-05	0.001183	5.95e-05	0.00039	4.51e-05	0.000962	0.000142	0.001373	0.000256	0.001308	4.68e-05	0.000818	1.05e-05	0.000549	2.33e-05
Minimum sample size (N~)	3	1	7	1	1	1	2	1	2	1	1	2	1	1	1	1	2
Correct min. sample size (N*)	8	6	13	6	6	6	7	6	7	6	6	7	6	6	6	6	7
Sample size (biological replicates)	8	8	14	6	7	7	7	7	13	8	6	8	9	9	7	7	9
Sufficient sampling?	yes	yes	yes	yes	yes	yes	yes	yes	yes	yes	yes	yes	yes	yes	yes	yes	yes
PPCC	0.987368	0.929953	0.973393	0.973833	0.977262	0.989891	0.954115	0.973543	0.987406	0.97605	0.987559	0.985873	0.970149	0.961547	0.966094	0.954948	0.960856
Critical value (a = 0.05 from NIST)	0.9043	0.9043	0.9343	0.888	0.897	0.897	0.897	0.897	0.931	0.9043	0.888	0.9043	0.9115	0.9115	0.897	0.897	0.9115
Normal?	yes	yes	yes	yes	yes	yes	yes	yes	yes	yes	yes	yes	yes	yes	yes	yes	yes
Frameshift site	WT		∆PK1		∆PK2		PKM1		PKM2		PKM3		HIV-1		∆PK3		Out-of-frame background control
Frameshift efficiency (%)	0.194		0.0298		0.0493		0.0252		0.095		0.287		0.0684		0.0085		N/A
Variance	5.19 X 10-5		4.28 X 10-6		1.31 X 10-6		8.33 X 10-7		1.36 X 10-5		7.28 X 10—5		2.1 X 10-6		3.42 X 10-8		N/A
Standard deviation	7.29 X 10-6		1.83 10-6		4.01 X 10-7		1.10 X 10-6		8.52 X 10-6		2.73 X 10-5		2.74 X 10-6		1.10 X 10-7		N/A
Standard error (%)	0.003		0.0006		0.0004		0.0003		0.001		0.003		0.0005		7e-05		N/A
Statistics			WT vs. ∆PK1		WT vs. ∆PKV2		WT vs. PKM1		WT vs. PKM2		WT vs. PKM3		WT vs. HIV-1		WT. ∆PK3		WT vs. Out-of-frame background control
Fold change			-0.85		-0.75		-0.87		-0.51		0.48		-0.65		-0.96		-0.99
Significant?			Yes		Yes		Yes		Yes		Yes		Yes		Yes		Yes
P-value			6.79 X 10-11		1.55 X 10-10		5.08 X 10-11		5.06 X 10-11		4.58 X 10--9		4.30 X 10-10		2.50 X 10-11		1.09 X 10-12
For each RNA construct, the following values are listed: maximum ratio, 75th percentile, median, 25th percentile, minimumratio, fourth spread (fs), upper outlier boundary, lower outlier boundary, sample mean, variance, standard deviation, standard error, sample size, probability plot correlation coefficient (PPCC), critical values, normality of data, number of outliers removed from data set, the …
